# Supplementary material for: A novel TiO2nanostructure as photoanode for highly efficient CdSe quantum dot-sensitized solar cells
Source: Royal Society of Chemistry journal article supplement (doi:10.1039/c6ra26029b), 2017-01-01
Supplement: c6ra26029b1.pdf [file c6ra26029b1.pdf]

## Supporting Information

A Novel TiO<sub>2</sub> Nanostructure as Photoanode for High Efficient CdSe Quantum Dots Sensitized Solar Cells

Y. B. Lu,<sup>a</sup> L. Li,<sup>\*a</sup> S. C. Su,<sup>b</sup> Y. J. Chen,<sup>c</sup> Y. L. Song<sup>a</sup> and S. J. Jiao<sup>d</sup>

<sup>a</sup>Key Laboratory for Photonic and Electronic Bandgap Materials, Ministry of Education, School of Physics and Electronic Engineering, Harbin Normal University, Harbin 150025, PR China.

<sup>b</sup>Institute of Opto-electronic Materials and Technology, South China Normal University, Guangzhou, 510631, PR China.

<sup>c</sup>Key Laboratory of In-Fiber Integrated Optics, Ministry of Education and College of Science, Harbin Engineering University, Harbin 150001, PR China.

<sup>d</sup>School of Materials Science and Engineering, Harbin Institute of Technology, Harbin 150001, P. R. China.

\* Corresponding author.

E-mail: [physics\\_lin@hotmail.com](mailto:physics_lin@hotmail.com) (L. Li)

---

\* To whom correspondence should be addressed. E-mail: [physics\\_lin@hotmail.com](mailto:physics_lin@hotmail.com)

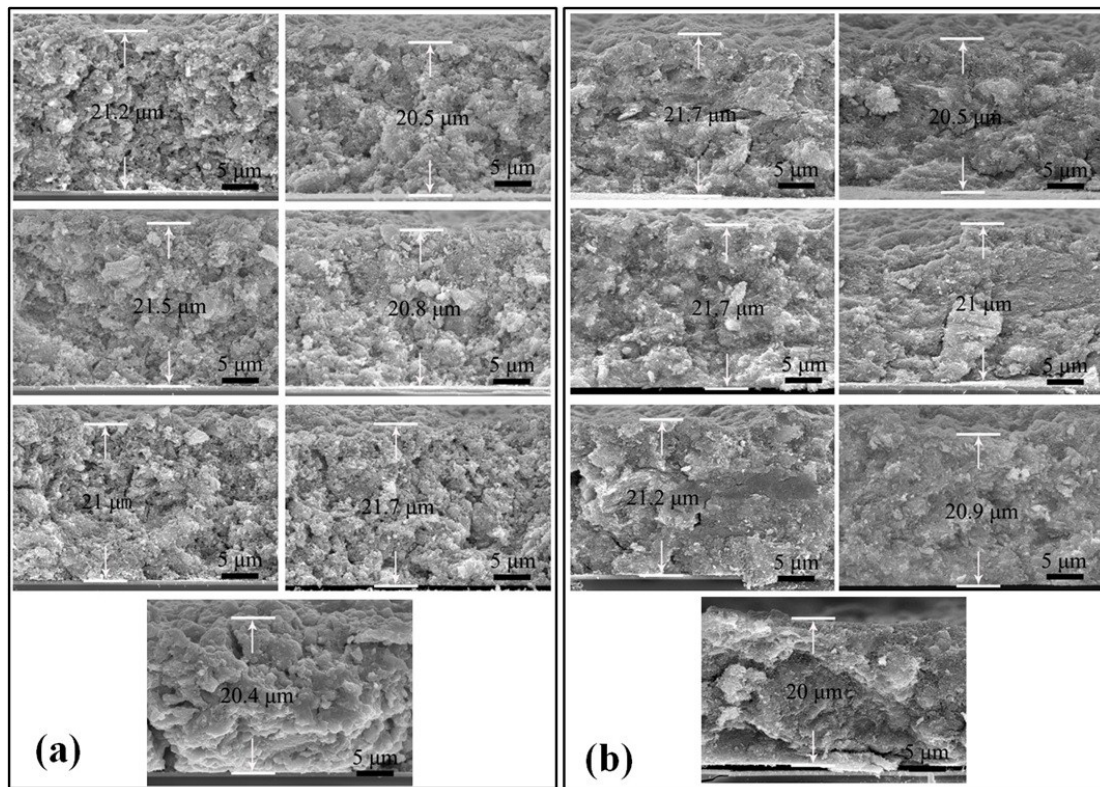

Figure S1. Cross-sectional SEM images of seven TNPs films (a) and seven 1D CTNPs films (b) deposited on FTO substrates by the same screen printing times.

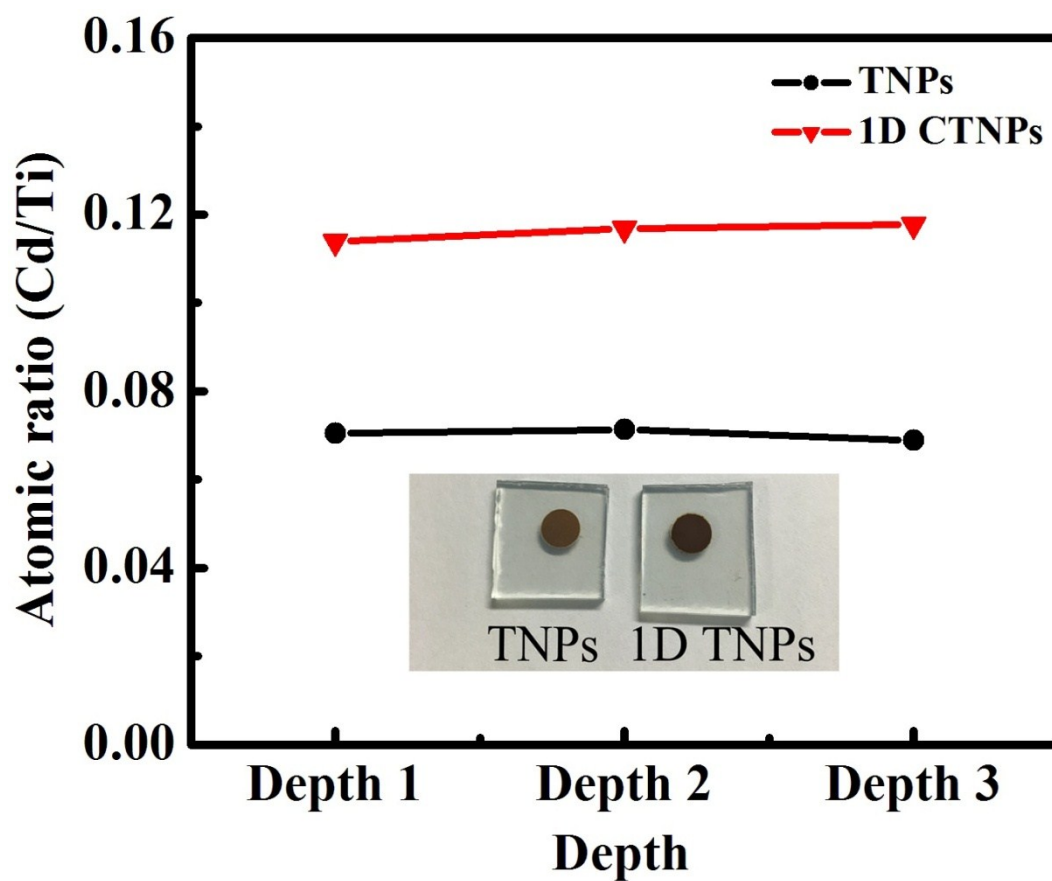

Figure S2. the atomic ratios of Cd/Ti in different depth of the TNPs/CdSe and 1D CTNPs/CdSe films

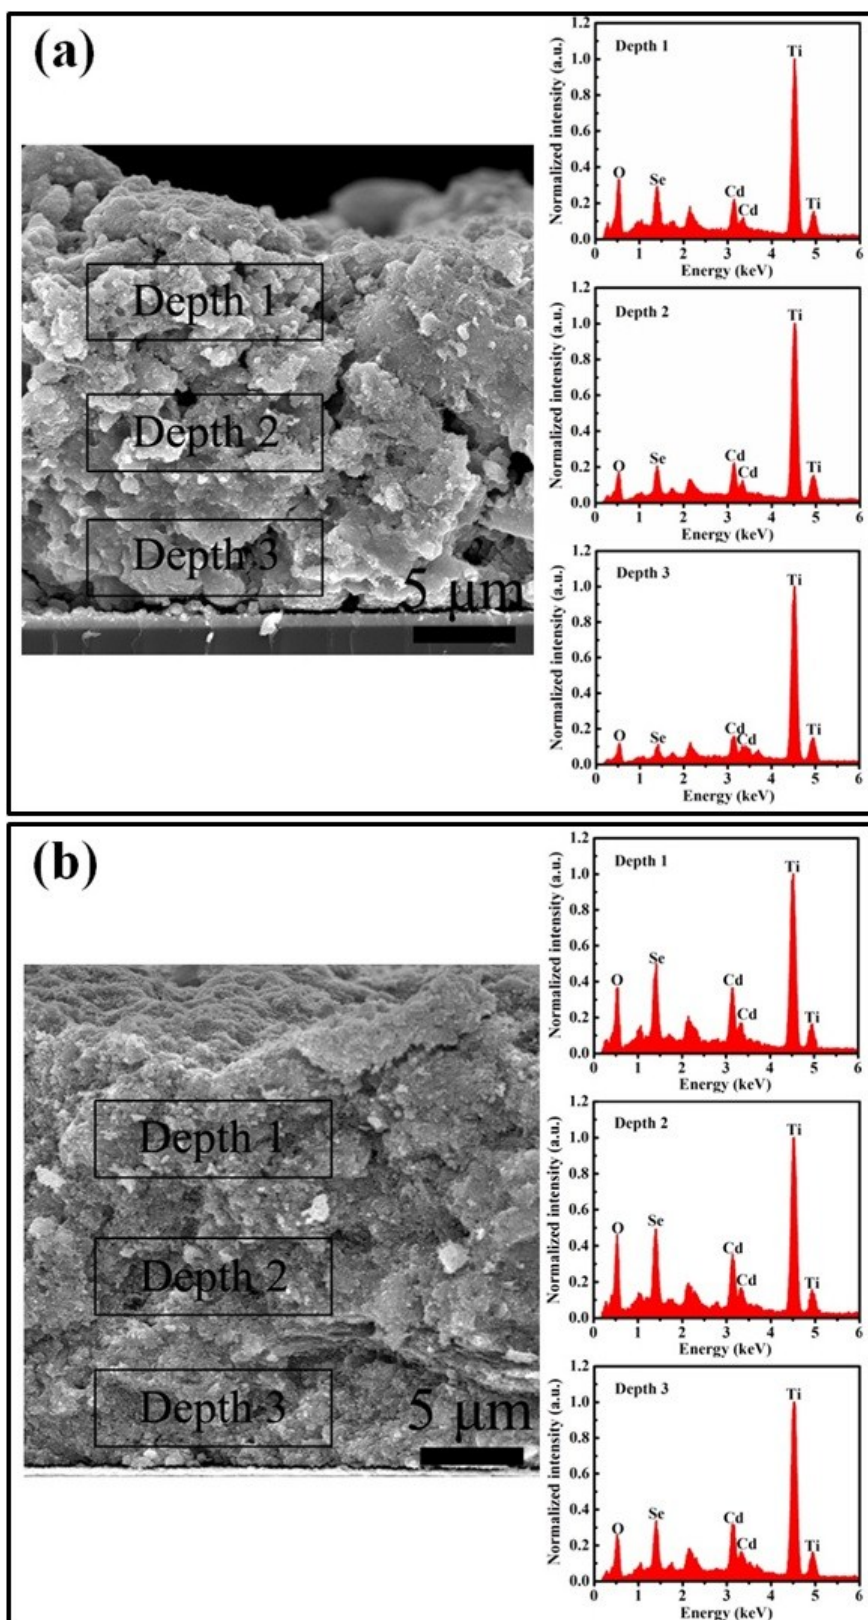

Figure S3. EDX images corresponding to different depths of the TNPs/CdSe film (a) and 1D CTNPs/CdSe film (b).
